# Supplementary material for: Catalytic cracking of n-pentane over CLD modified HZSM-5 zeolites
Source: Royal Society of Chemistry journal article supplement (doi:10.1039/c6ra10102j), 2016-01-01
Supplement: c6ra10102j1.pdf [file c6ra10102j1.pdf]

## Supplementary materials

# Catalytic cracking of n-pentane over CLD modified HZSM-5 zeolites

Xu Hou, Yuan Qiu, Xiangwen Zhang, and Guozhu Liu\*

Key Laboratory of Green Chemical Technology of Ministry of Education, School of Chemical

Engineering and Technology, Collaborative Innovation Center of Chemical Science and

Engineering, Tianjin University, Tianjin 300072, PR China

\*Corresponding author: Guozhu Liu, Email: [gliu@tju.edu.cn](mailto:gliu@tju.edu.cn)

Table S1 Experiment parameters for the CLD strategy

| Precursors                     | Code | Catalyst (g): Ethanol (mL): Precursor ( $\mu\text{L}$ ) |
|--------------------------------|------|---------------------------------------------------------|
| Tetraethyl orthosilicate, TEOS | S    | 1:25:150                                                |
| Tetrabutyl orthotitanate, TBOT | T    | 1:25:175                                                |
| Tetrabutyl orthosilicate, TBOS | B    | 1:25:240                                                |

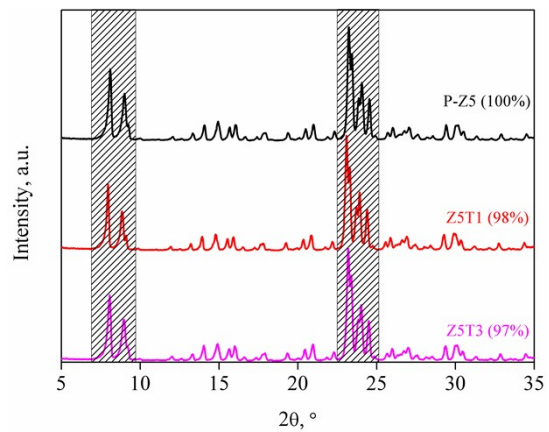

Fig. S1 XRD patterns of the parent and TiO<sub>2</sub>-CLD modified HZSM-5 zeolites.

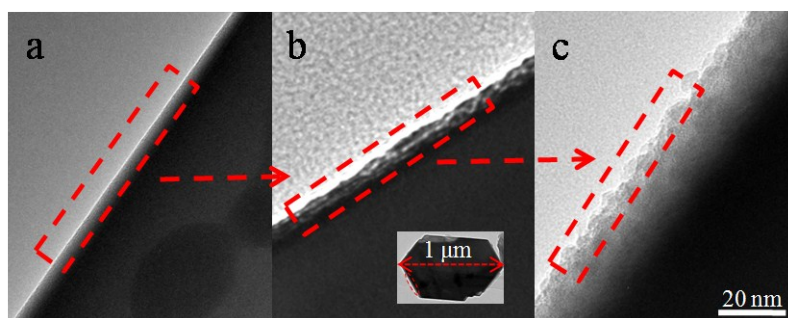

Fig. S2 TEM images of (a) P-Z5, (b) Z5T1, and (c) Z5T3.

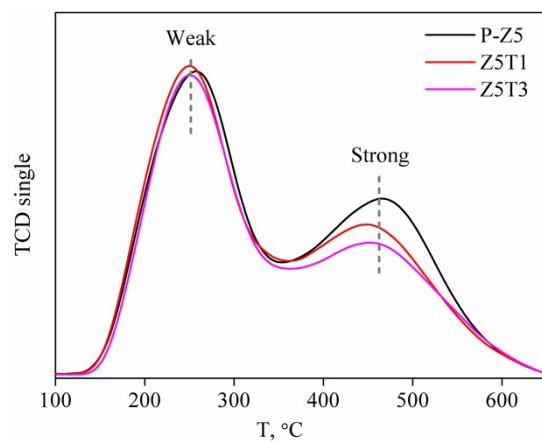

Fig. S3 NH<sub>3</sub>-TPD profiles of the parent and TiO<sub>2</sub>-CLD modified HZSM-5 zeolites.

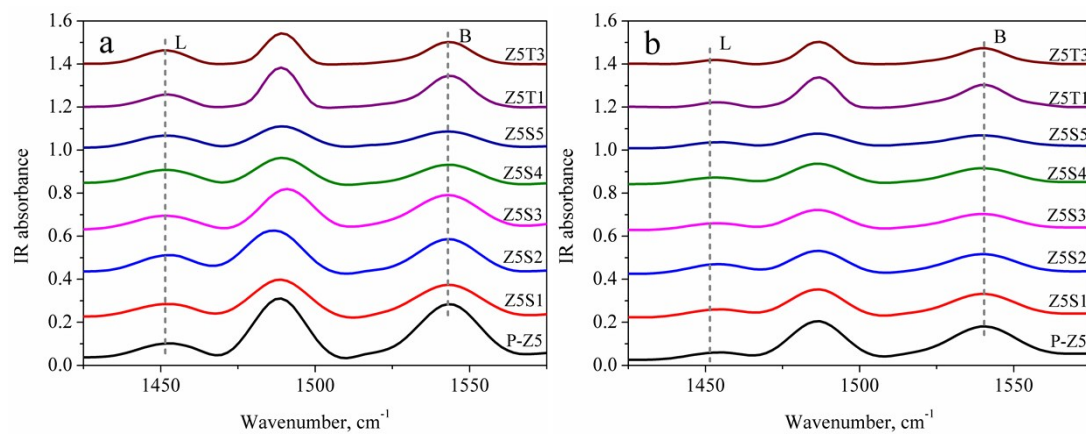

Fig. S4 Py-IR spectra of the parent and CLD modified HZSM-5 zeolites: (a) 200 °C and (b) 350 °C.

## **S1 Blank experiments**

Blank experiments were carried out in an empty reactor and a reactor loaded with diluents (SiC, 1 g) under the reaction conditions: n-pentane, 1.2 mL·h<sup>-1</sup>; partial pressures, 2 kPa; temperature, 500-550 °C, respectively. The results indicated that n-pentane can hardly cracking under these conditions, and the conversion was zero.

## S2 Mass balance

During n-pentane cracking, the products heavier than C5 may be generated on the traceable level, and it was not given in the Micro 490GC. Based on the element balance analysis at 500 °C (Fig. S5), it was figured out that both H/C (equation S1) and N/C (equation S2) atom ratio were approximately equal to the theoretical values 2.4 and 18.8, indicating that the heavy products was of insignificance in n-pentane cracking, and it was feasible to investigate n-pentane cracking on this experiment apparatus.

$$\frac{H}{C} = \frac{\sum m \cdot (i)}{\sum n \cdot (i)} \quad (S1)$$

$$\frac{N}{C} = \frac{2 \cdot (N_2)}{\sum n \cdot (i)} \quad (S2)$$

where (i) is the corresponding mole fraction of species i. ( $N_2$ ) is the mole fraction of  $N_2$  in product.

Letter “m” and “n” refer to the number of hydrogen and carbon atom in species i, respectively.

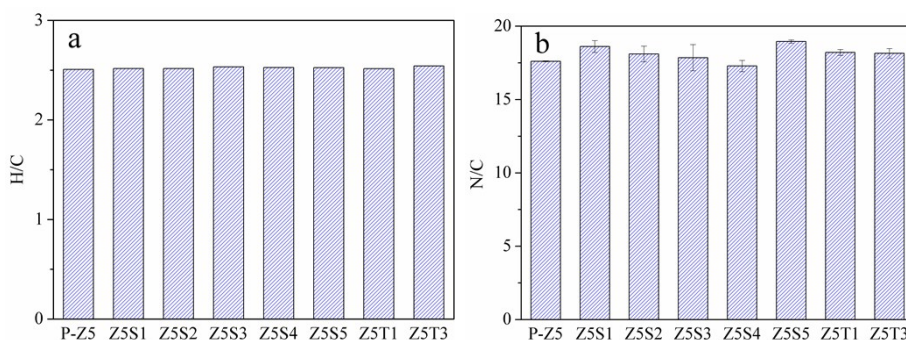

Fig. S5 Element balance analysis of the products for n-pentane cracking at 500 °C: (a) H/C atom ratio and (b) N/C atom ratio.



### S3 Influence of precursor size

In order to explore the influence of precursor size, TBOS (tetrabutyl orthosilicate) was selected to replace TEOS in the CLD strategy, and the achieved catalyst was labeled as Z5B1. As shown in Table S2, the two catalysts with 1-cycle CLD modification, Z5S1 and Z5B1, exhibited the similar physical and chemical properties. As presented in Fig. S6, in the stability test, negligible difference was detected between the two catalysts, indicating that the size of CLD precursor can hardly influence the porous layer and the final catalytic performance in the scope of investigation.

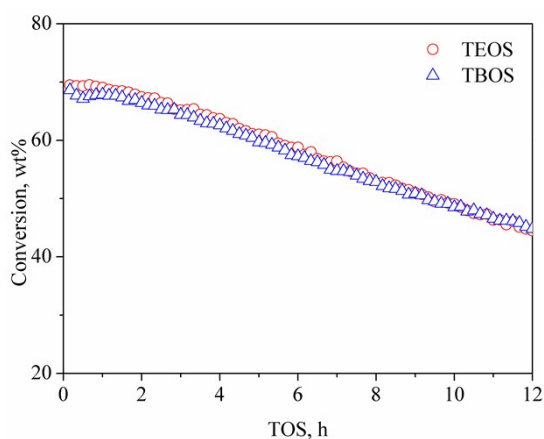

Fig. S6 Stability test for the Si<sub>2</sub>O-CLD modified HZSM-5 catalysts with different precursor sizes

(T, 550 °C).

Table S2 Properties of Z5S1 and Z5B1

| Catalyst | SiO <sub>2</sub> -loading <sup>a</sup><br>(wt%) | S <sub>BET</sub> <sup>b</sup><br>(m <sup>2</sup> ·g <sup>-1</sup> ) | S <sub>mic</sub> <sup>c</sup><br>(m <sup>2</sup> ·g <sup>-1</sup> ) | S <sub>ext</sub> <sup>c</sup><br>(m <sup>2</sup> ·g <sup>-1</sup> ) | V <sub>t</sub> <sup>d</sup><br>(cm <sup>3</sup> ·g <sup>-1</sup> ) | V <sub>mic</sub> <sup>c</sup><br>(cm <sup>3</sup> ·g <sup>-1</sup> ) | V <sub>mes</sub><br>(cm <sup>3</sup> ·g <sup>-1</sup> ) | Acid sites amount <sup>e</sup><br>(mmol·g <sup>-1</sup> ) | S/W <sup>e</sup> | B <sub>T</sub> /L <sub>T</sub> <sup>f</sup> | B <sub>S</sub> /L <sub>S</sub> <sup>g</sup> |
|----------|-------------------------------------------------|---------------------------------------------------------------------|---------------------------------------------------------------------|---------------------------------------------------------------------|--------------------------------------------------------------------|----------------------------------------------------------------------|---------------------------------------------------------|-----------------------------------------------------------|------------------|---------------------------------------------|---------------------------------------------|
| Z5S1     | 4                                               | 368.5                                                               | 323.9                                                               | 44.6                                                                | 0.172                                                              | 0.133                                                                | 0.039                                                   | 2.823                                                     | 0.90             | 4.0                                         | 8.5                                         |
| Z5B1     | 4                                               | 365.4                                                               | 320.8                                                               | 44.7                                                                | 0.172                                                              | 0.131                                                                | 0.041                                                   | 2.802                                                     | 0.90             | 3.9                                         | 8.2                                         |

<sup>a</sup> The theoretical loading amount. <sup>b</sup> Estimated by BET method. <sup>c</sup> Estimated by t-plot method. <sup>d</sup> Calculated from N<sub>2</sub> uptake at P/P<sub>0</sub>=0.99. <sup>e</sup> Determined by NH<sub>3</sub>-TPD (S and W represent strong and weak acid sites). <sup>f</sup> Determined by Py-IR at 200 °C (B, L and T represent Brønsted, Lewis and total acid sites). <sup>g</sup> Determined by Py-IR at 350 °C.

#### S4 Verification of equation (8)

As shown in equation (8), the apparent reaction rate per B acid site ( $R_{app}$ ) was positively linear with the reactant partial pressure ( $P_{par}$ ), and the influences of acid strength and conversion level were not reflected. Thus, it is feasible to verify equation (8) though adjusting experiment conditions. The first experiment (No. 1) was designed by adjusting the  $P_{par}$  of reactant in the gas phase. And it was found that compared with the parent experiment (No. P), the half  $P_{par}$  led to a half  $R_{app}$  value. The other two experiments (No. 2 and 3) were designed by adjusting  $SiO_2/Al_2O_3$  of HZSM-5 zeolite and WHSV value to tailor the acid strength and conversion level, respectively. It was found that the two factors resulted in a slight influence on the  $R_{app}$  value. Thus, it can be concluded that within the experimental uncertainties, equation (8) was feasible to describe the reaction kinetic of n-pentane cracking under the reaction condition in this paper.

Table S3 Experiment plans and results

| No. | Catalyst            | WHSV ( $h^{-1}$ ) | $P_{par}$ (kPa) | X (%) | $R_{app}$ ( $g(n\text{-pentane}) \cdot mmol(BAS)^{-1} \cdot h^{-1}$ ) |
|-----|---------------------|-------------------|-----------------|-------|-----------------------------------------------------------------------|
| P   | P-Z5                | 3.7               | 2               | 32.6  | 0.56                                                                  |
| 1   | P-Z5                | 3.7               | 1               | 18.0  | 0.28                                                                  |
| 2   | Z5(50) <sup>a</sup> | 3.7               | 2               | 20.0  | 0.50                                                                  |
| 3   | P-Z5                | 7.4               | 2               | 16.5  | 0.52                                                                  |

<sup>a</sup> The properties of Z5(50) was shown in Table S4.

Table S4 Acid properties of P-Z5 and Z5(50)

| Catalyst | Acid sites amount <sup>a</sup> ( $mmol \cdot g^{-1}$ ) | S/W <sup>a</sup> | $B_T/L_T$ <sup>b</sup> | $B_S/L_S$ <sup>c</sup> |
|----------|--------------------------------------------------------|------------------|------------------------|------------------------|
| P-Z5     | 3.054                                                  | 0.88             | 5.5                    | 10.8                   |
| Z5(50)   | 2.011                                                  | 0.91             | 4.9                    | 9.7                    |

<sup>a</sup> Determined by  $NH_3$ -TPD (S and W represent strong and weak acid sites). <sup>b</sup> Determined by Py-IR at 200 °C (B, L and T represent Brønsted, Lewis and total acid sites). <sup>c</sup> Determined by Py-IR at 350 °C.
